# Supplementary material for: Comparison of the Anti-inflammatory Properties of Two Nicotinic Acetylcholine Receptor Ligands, Phosphocholine and pCF3-diEPP
Source: PubMed Central journal article supplement (PMC9008208; doi:10.3389/fncel.2022.779081), 2022-03-31
Supplement: Data_Sheet_1.pdf [file Data_Sheet_1.pdf]

## Supplementary Material

### Supplementary Figures

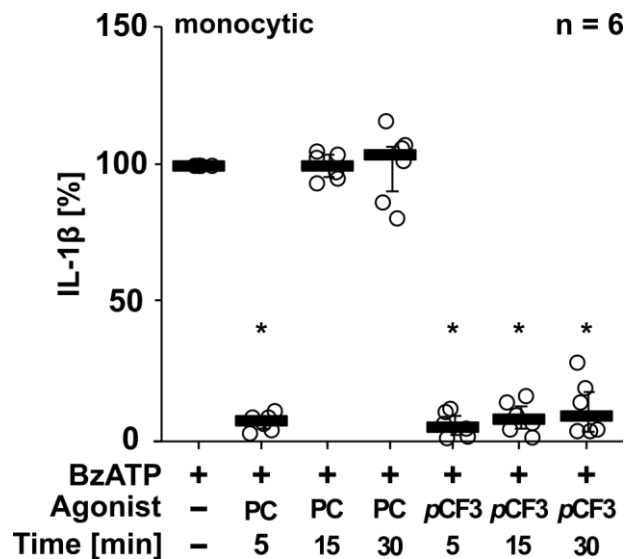

**Supplemental Figure S1: Stability of phosphocholine (PC) and pCF3-diEPP (pCF3) in cell culture experiments.** Monocytic THP-1 cells were primed with lipopolysaccharide (LPS; 1  $\mu$ g/ml, 5 h). Thereafter, the P2X7 receptor agonist BzATP ((2'/3'-O-(4-benzoylbenzoyl)adenosine-5'-triphosphate, tri(triethylammonium) salt) was added for another 40 min to trigger IL-1 $\beta$  release, which was measured by ELISA. To investigate the stability of PC (200  $\mu$ M) and pCF3-diEPP (100  $\mu$ M) in cell culture, the agonists were added to LPS-primed monocytic THP-1 cells 5, 15 and 30 min before stimulation with BzATP (100  $\mu$ M). The concentration of IL-1 $\beta$  released in response to BzATP was calculated by subtracting the IL-1 $\beta$  concentrations measured in supernatants of cells treated with LPS alone. In each experiment, the IL-1 $\beta$  concentration obtained after stimulation with BzATP was set to 100% and all other values were calculated accordingly. Data are presented as individual data points, bars represent median, whiskers encompass the 25<sup>th</sup> to 75<sup>th</sup> percentile. \* $p \leq 0.05$ , different from LPS-primed cells stimulated with BzATP alone. Friedman-test followed by the Wilcoxon signed-rank test.

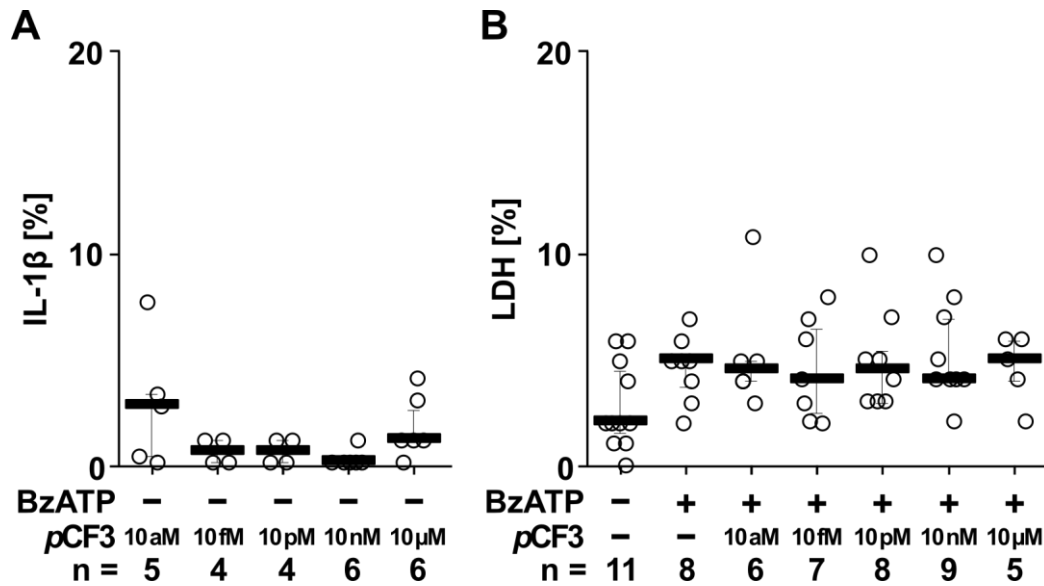

**Supplemental Figure S2: Control experiments and test for cell death in human peripheral blood mononuclear cells (PBMCs).** PBMCs were freshly isolated from blood of healthy human volunteers and primed with lipopolysaccharide (LPS, 5 ng/ml) during the isolation process. After 3 h of culture, PBMCs were purified by adherence selection. **(A)** The silent agonist *p*CF3-diEPP (*p*CF3) did not induce changes in IL-1 $\beta$  levels of LPS primed human PBMCs in the absence of the P2X7 receptor agonist BzATP ((2'/3'-O-(4-benzoylbenzoyl)adenosine-5'-triphosphate, tri(triethylammonium) salt, 100  $\mu$ M). **(B)** Cell death was estimated by measurement of lactate dehydrogenase (LDH) in cell free cell culture supernatants. Data are presented as individual data points, bars represent median, whiskers encompass the 25<sup>th</sup> to 75<sup>th</sup> percentile.
